# Supplementary material for: The Association of Annexin A1 and Chemosensitivity to Osimertinib in Lung Cancer Cells
Source: MDPI journal article supplement (doi:10.3390/cancers13164106), 2021-08-15
Supplement: s1 [file s1]

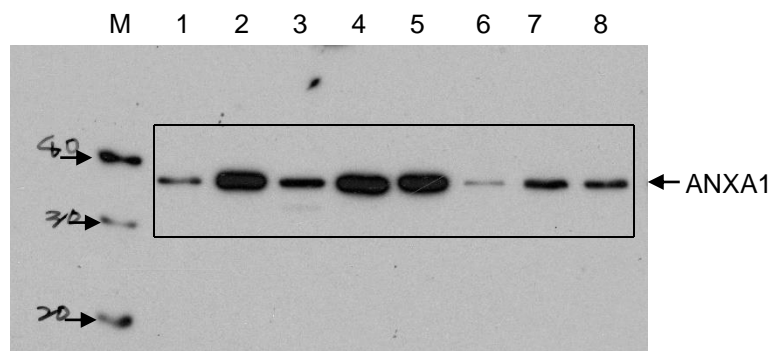

- 1.WI-38
- 2.A549
- 3.H460
- 4.H1650
- 5.H1975
- 6.H157
- 7.PC9
- 8.H1703

FIG 1A-1

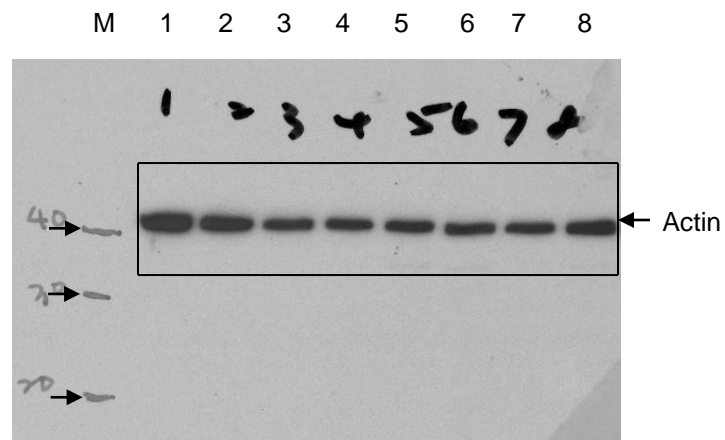

FIG-1A-2

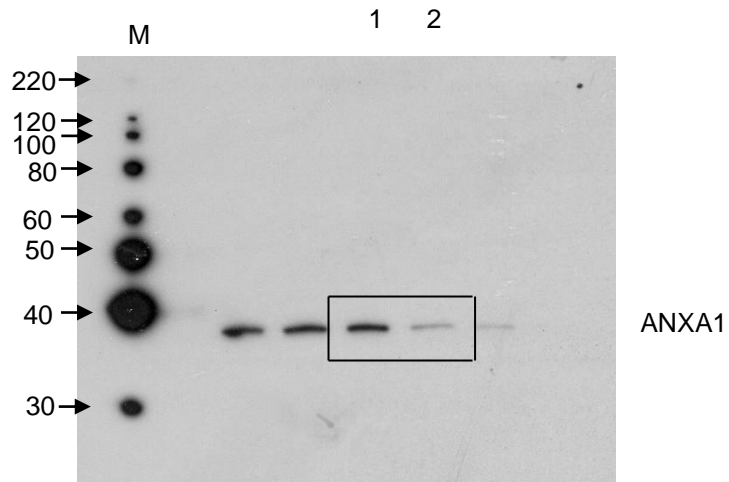

FIG 1B-1

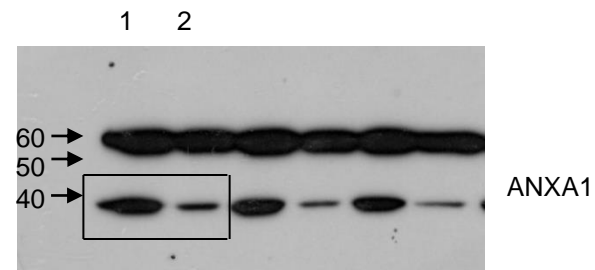

FIG 1B-2

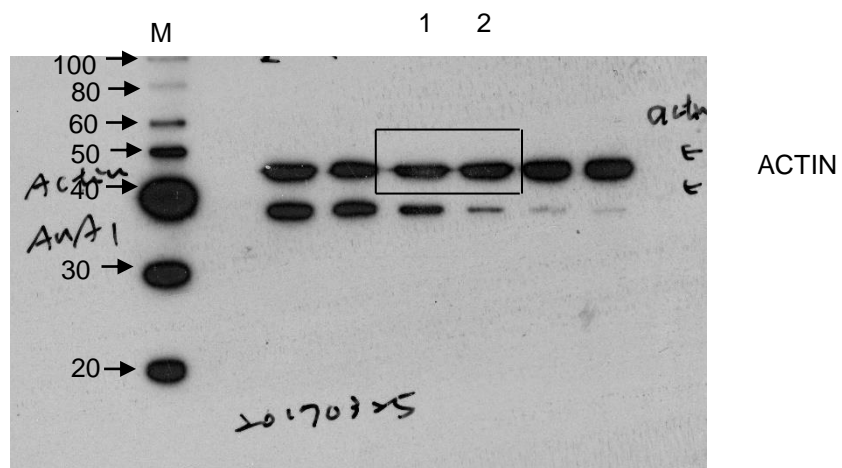

FIG 1B-1

1.A549 Ctrl  
2.A549 ANXA1

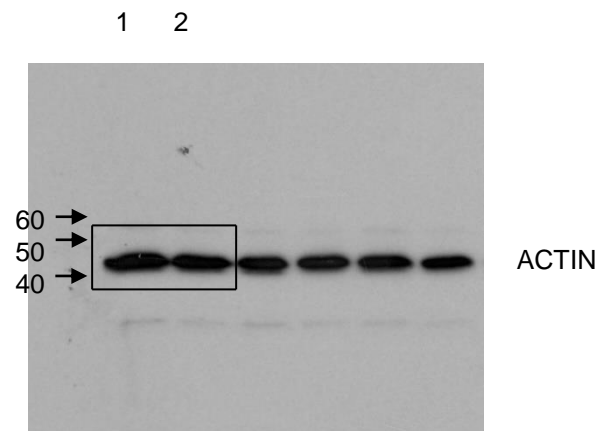

FIG 1B-2

1.H1975 Ctrl  
2.H1975 ANXA1

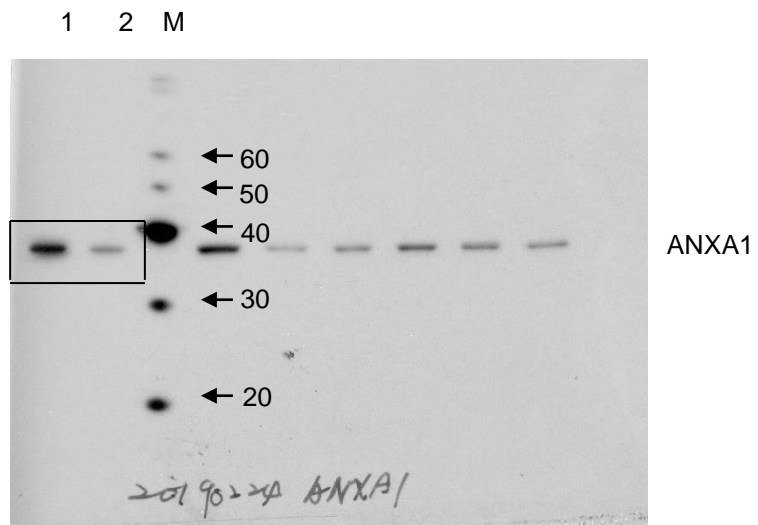

FIG 1B-3

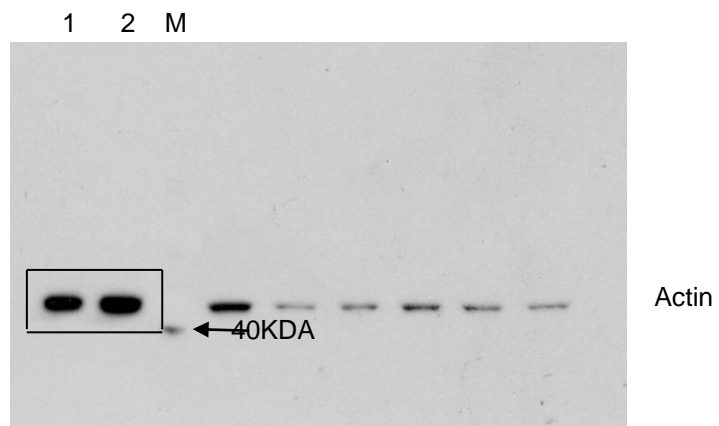

FIG 1B-3

1.H1650 Ctrl

2.H1650 ANXA1

H1975

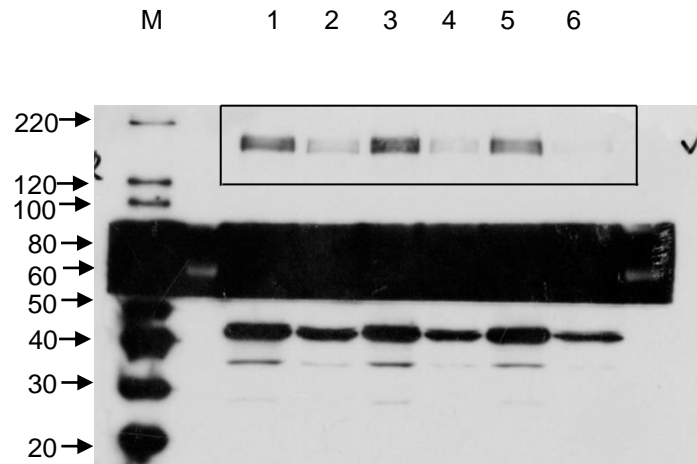

FIG-4A-1

pEGFR

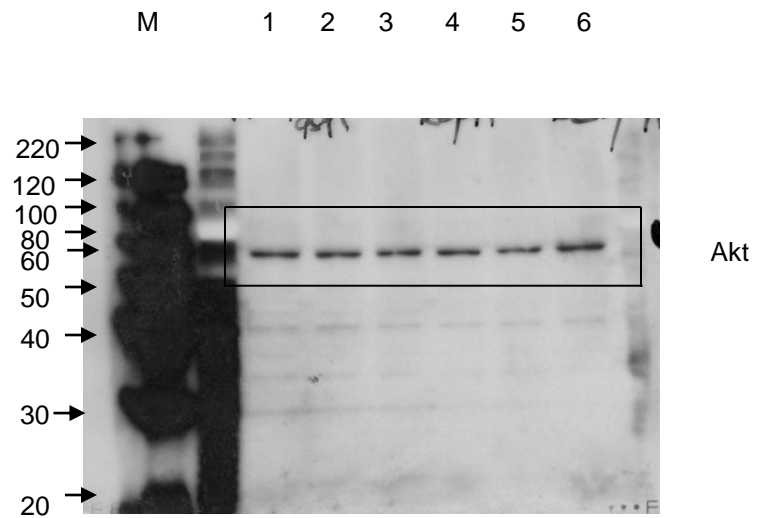

Akt

FIG-4A-4

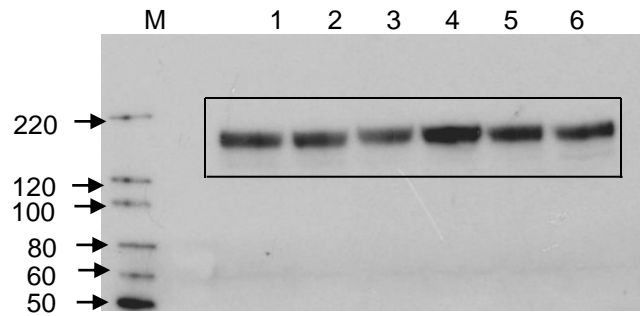

EGFR

FIG-4A-2

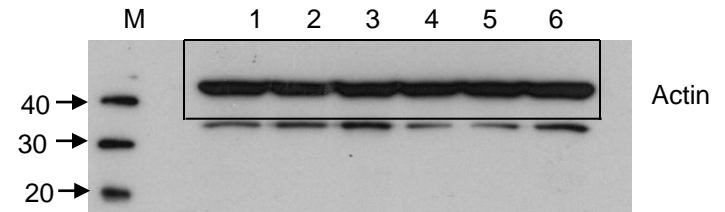

Actin

FIG-4A-5

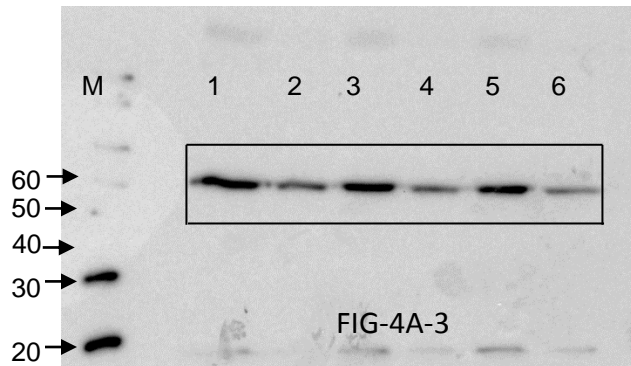

pAKT

FIG-4A-3

1. Mock
2. Mock+Osimertinib
3. Ctrl
4. Ctrl+Osimertinib
5. SiANXA1
6. SiANXA1+Osimertinib

H1650

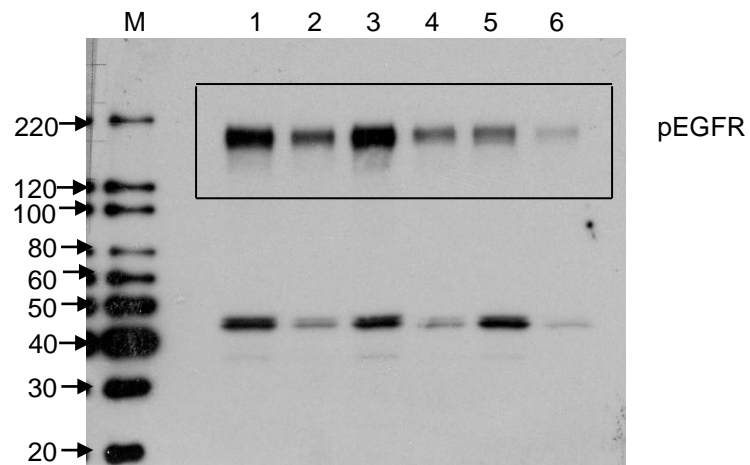

FIG-4B-1

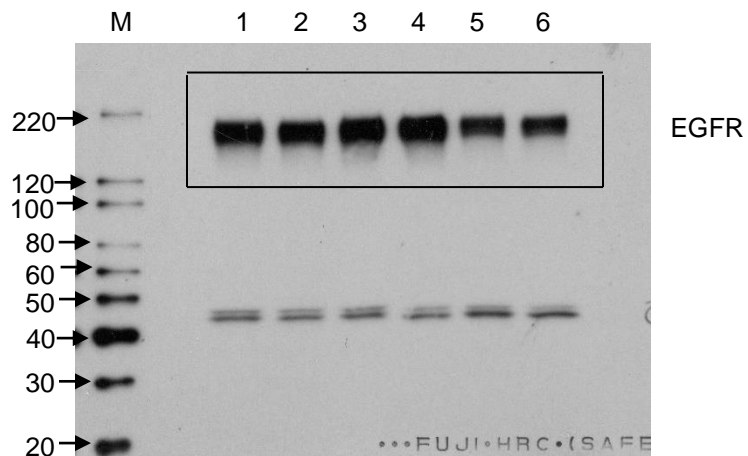

FIG-4B-2

1. Mock
2. Mock+Osimertinib
3. Ctrl
4. Ctrl+Osimertinib
5. SiANXA1
6. SiANXA1+Osimertinib

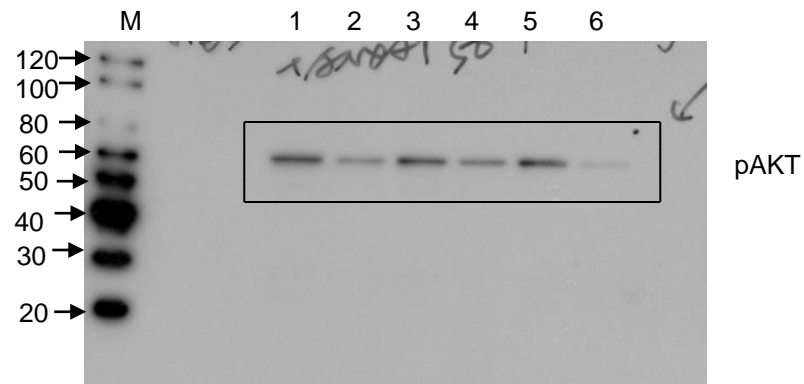

FIG-4B-3

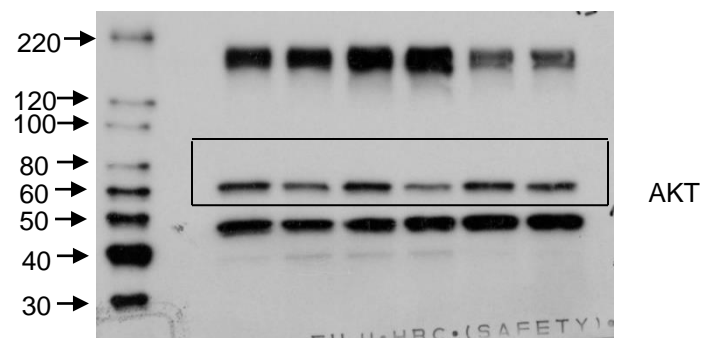

FIG-4B-4

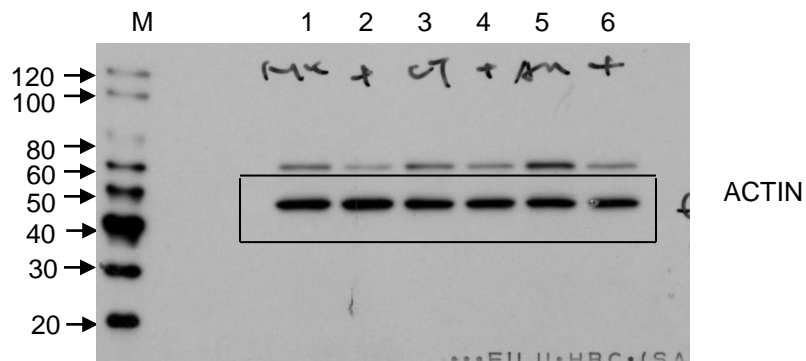

FIG-4B-5

H1975

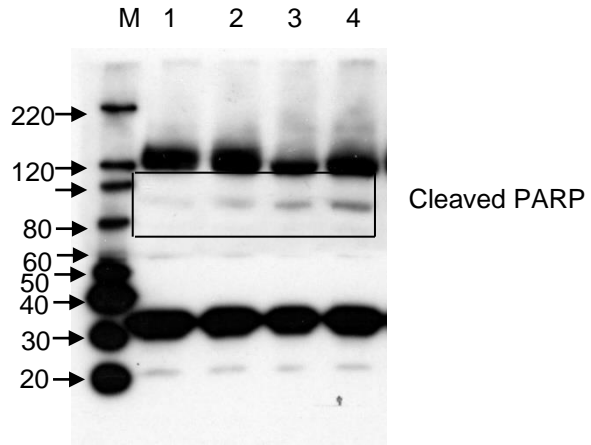

FIG-4C-1

H1975

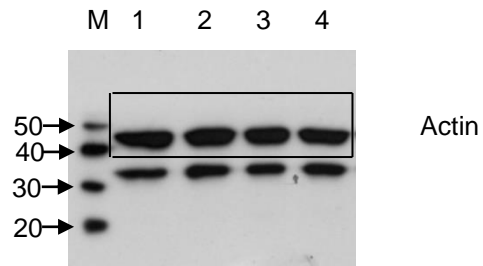

FIG-4C-1

H1650

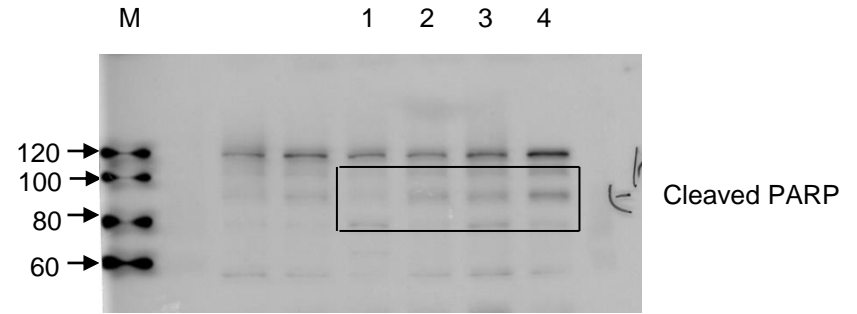

FIG-4D-1

H1650

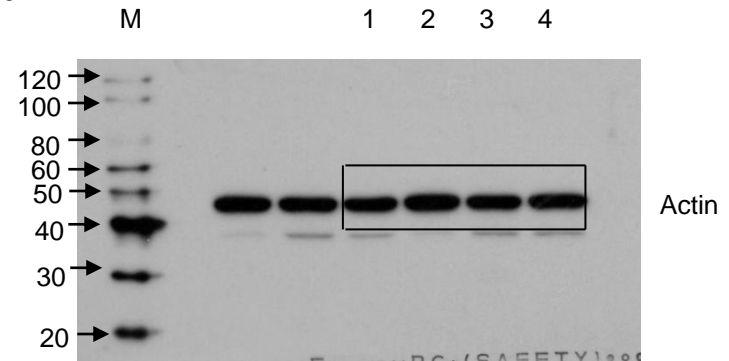

FIG-4D-1

1. Ctrl
2. Ctrl+Osimertinib
3. SiANXA1
4. SiANXA1+Osimertinib

H1975

M 1 2 3 4 5 6

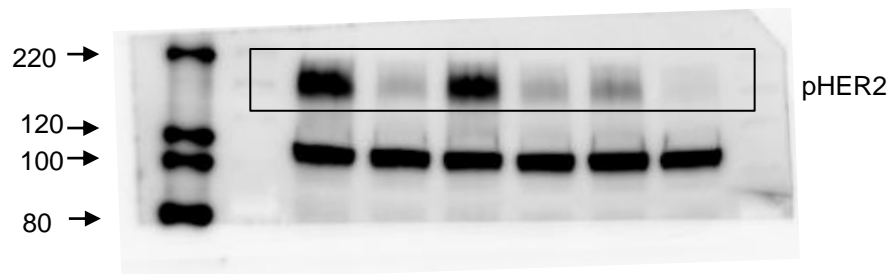

FIG-4G-1

M 1 2 3 4 5 6

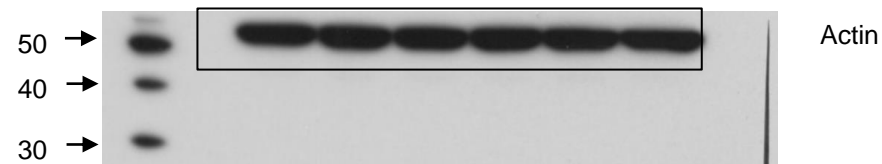

FIG-4G-3

M 1 2 3 4 5 6

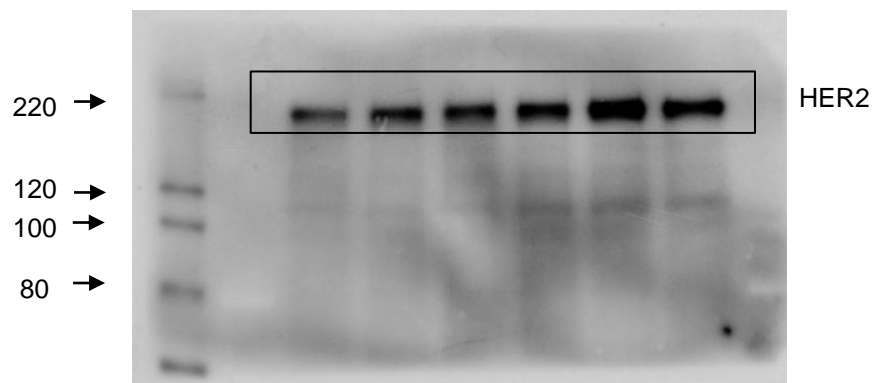

FIG-4G-2

1. Mock
2. Mock+Osimertinib
3. Ctrl
4. Ctrl+Osimertinib
5. SiANXA1
6. SiANXA1+Osimertinib

H1650

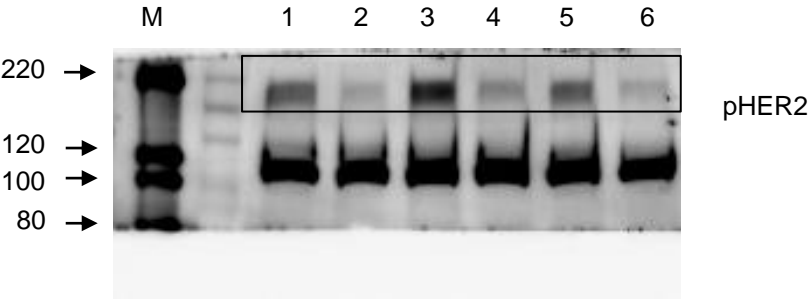

FIG-4H-1

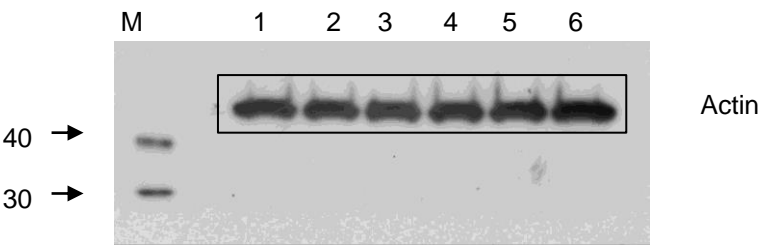

FIG-4G-3

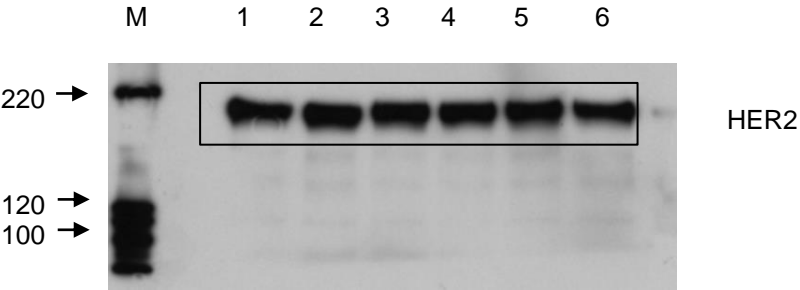

FIG-4H-2

- 1. Mock
- 2. Mock+Osimertinib
- 3. Ctrl
- 4. Ctrl+Osimertinib
- 5. SiANXA1
- 6. SiANXA1+Osimertinib



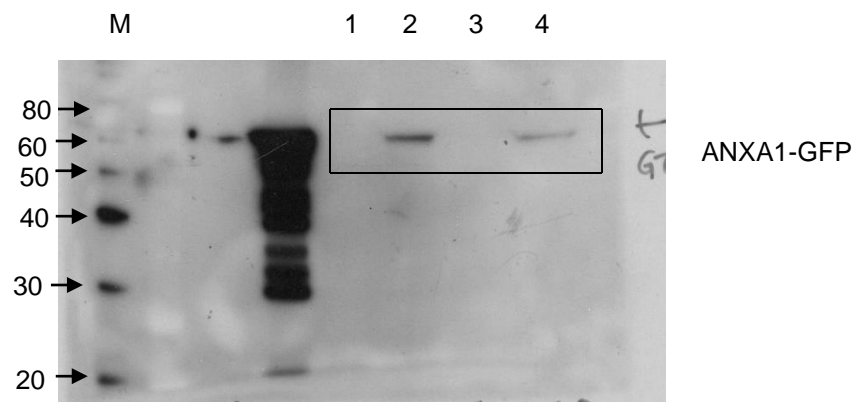

- 1.H1975 pCMV-6-AC-GFP(EV)
- 2.H1975 pCMV-6-ANXA1-GFP(ANXA1)
- 3.H1650 pCMV-6-AC-GFP(EV)
- 4.H1650 pCMV-6-ANXA1-GFP(ANXA1)

FIG.6A-1

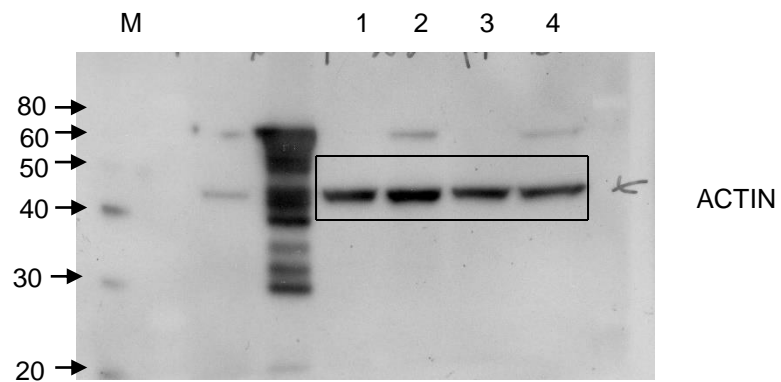

FIG.6A-2
